# Supplementary material for: Lipopeptide biosynthesis in Pseudomonas fluorescens is regulated by the protease complex ClpAP
Source: PubMed Central journal article supplement (PMC4332742; doi:10.1186/s12866-015-0367-y), 2015-02-14

Figure S1

A

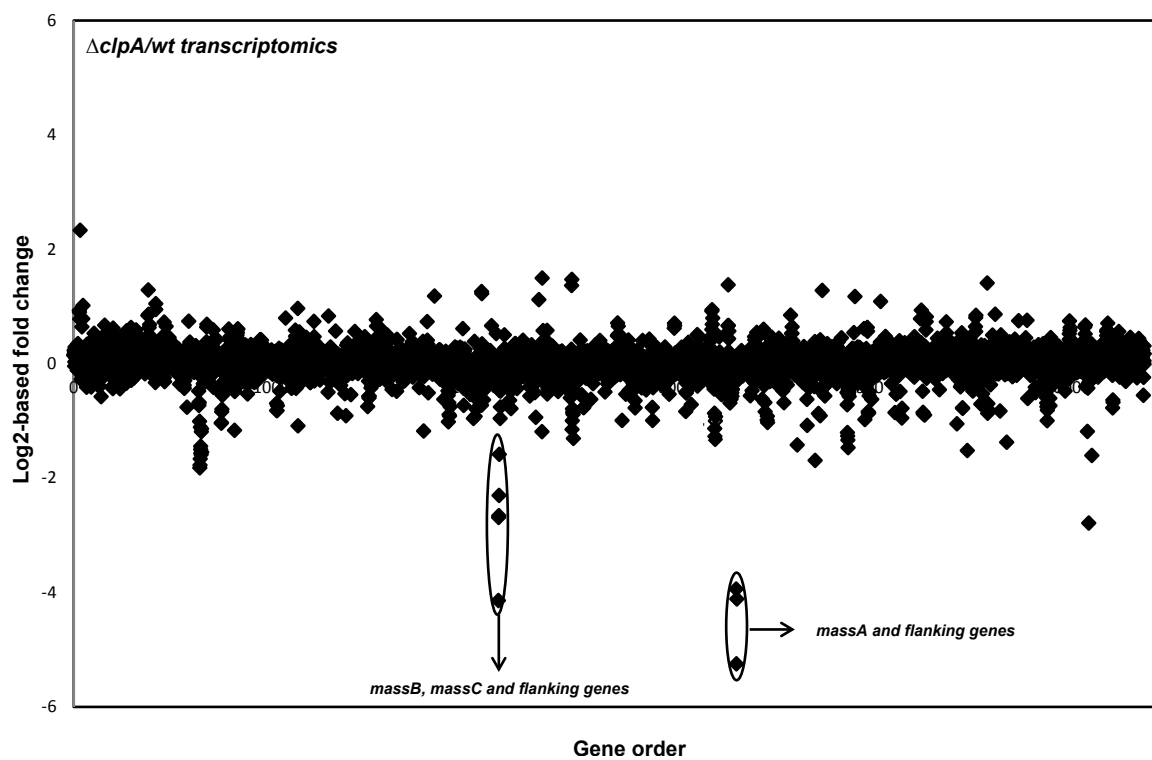

B

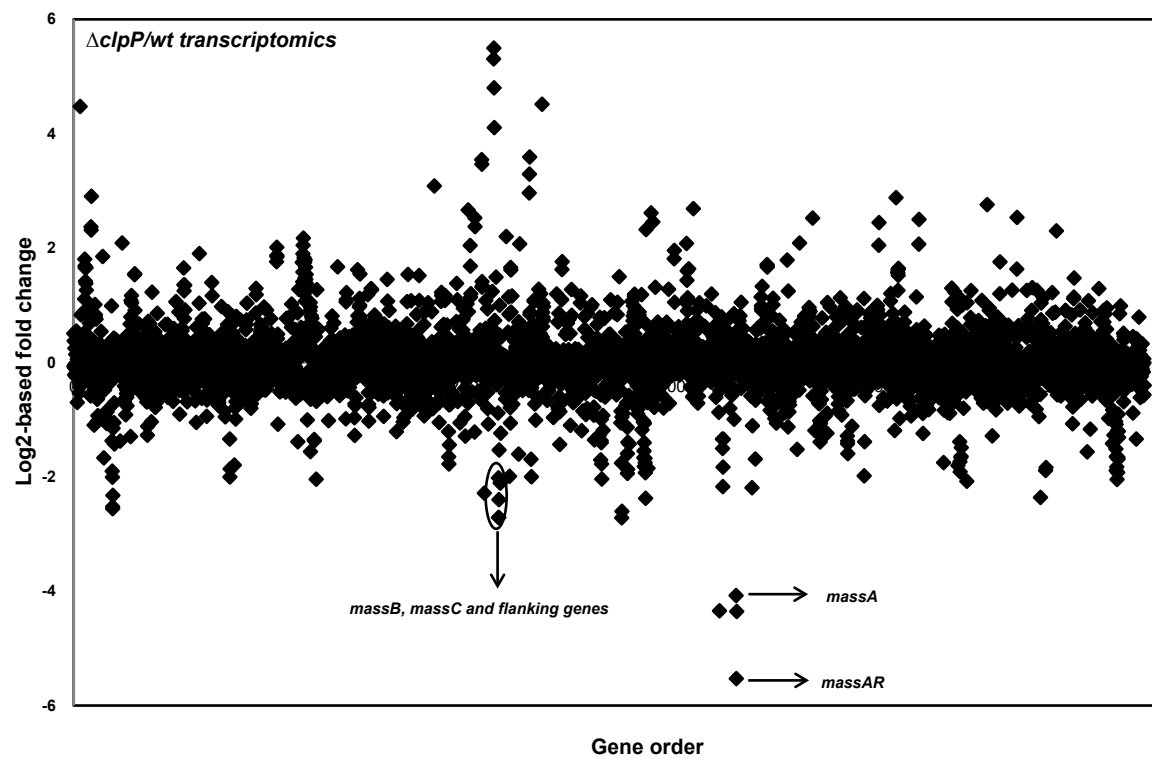

Figure S2

A

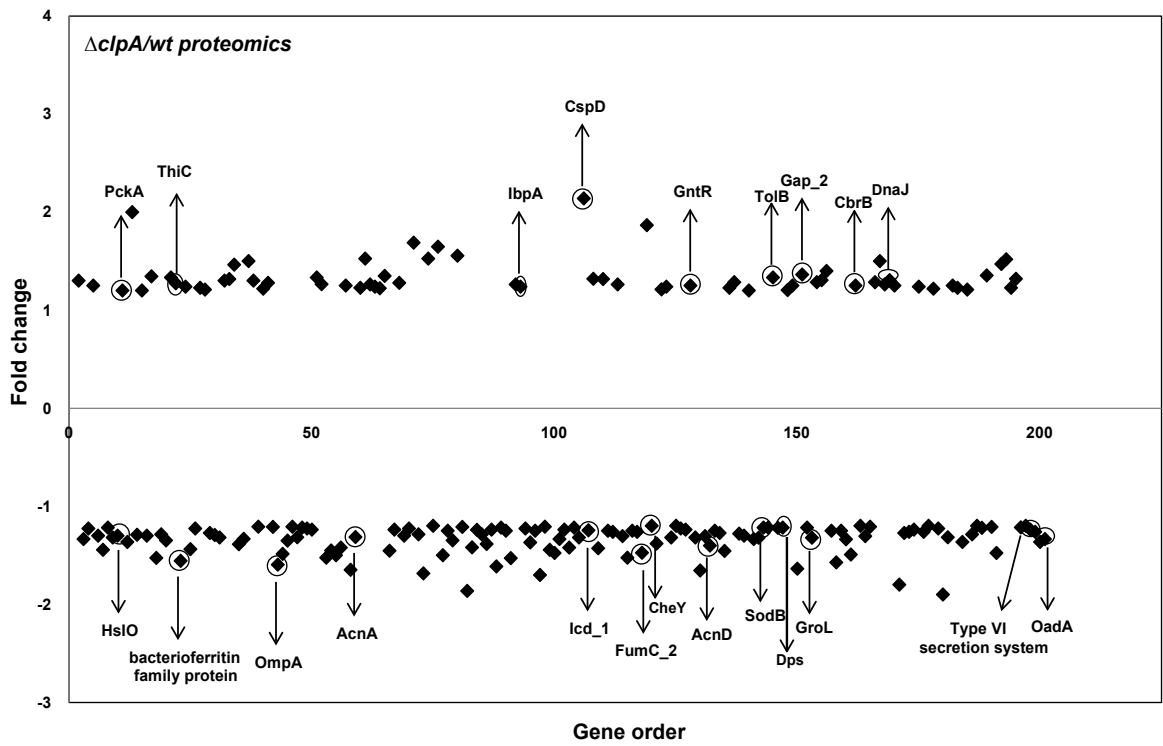

B

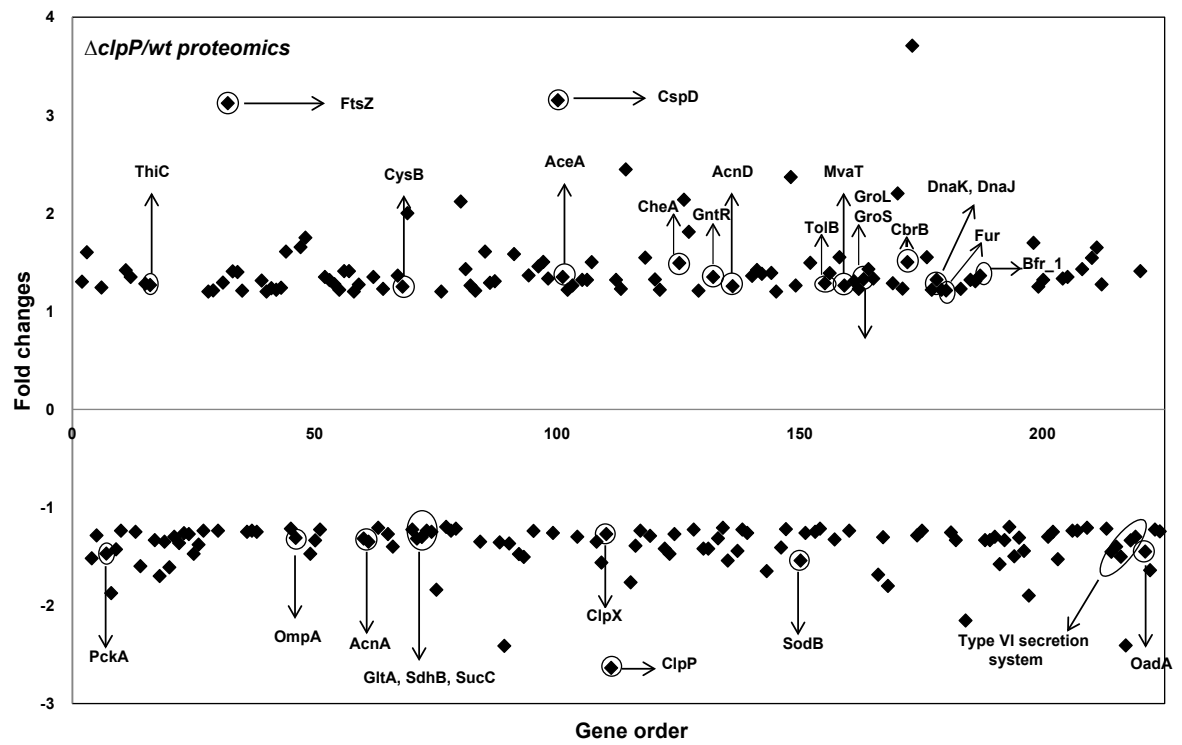

Figure S3

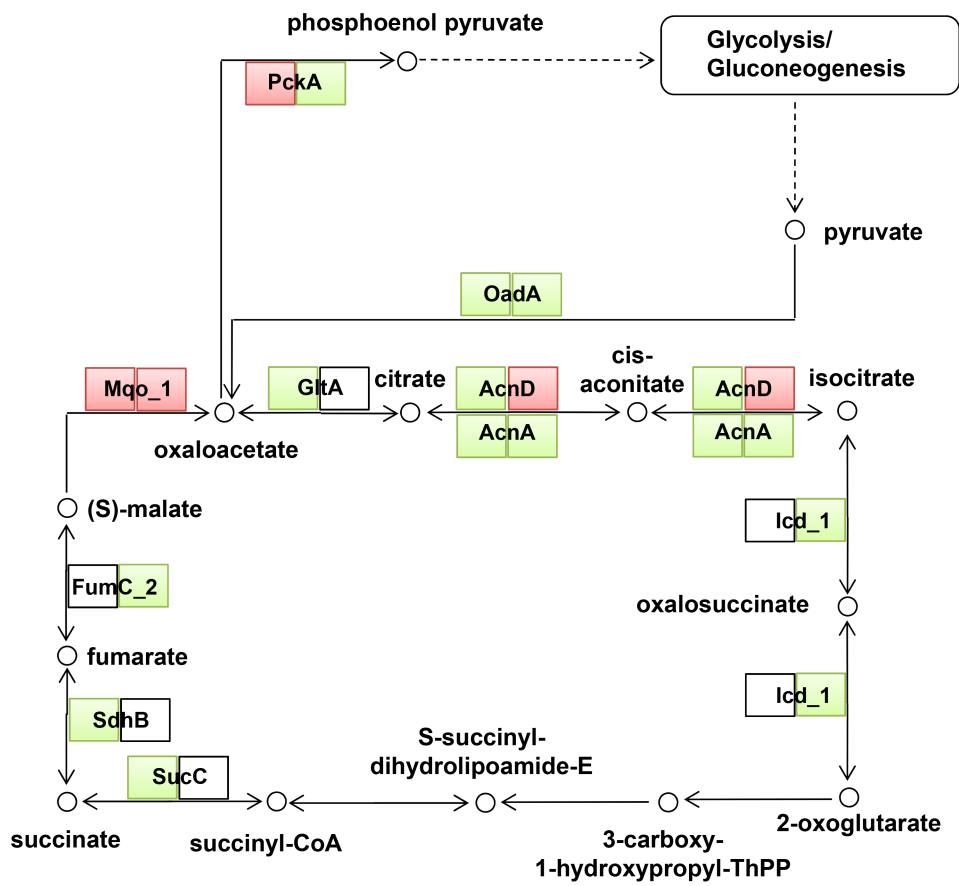

Supplement: 12866_2015_367_MOESM1_ESM.pdf [file 12866_2015_367_MOESM1_ESM.pdf]
